# Supplementary material
Source: publisher site journal article supplement (https://jmir.org/api/download?alt_name=medinform_v6i4e11252_app2.docx)
Supplement: Supplementary file [file download]

## Appendix B: Questionnaire for the patients

### 1. Satisfaction

- a. pa.general.sat.1: How satisfied are you with the application's health care output in its entirety?
- b. pa.general.sat.2: How well the application fulfills your expectations in health care delivery?
- c. pa.general.sat.3: Imagine a perfect application in all aspects of health care delivery. How far away from that is the application you are using today?

### 2. Adherence

- a. pa.adherability: The application increased my motivation for the treatments

### 3. Affordability

- a. pa.affordability: The health care service delivered through the application is more affordable or decrease expenditures, comparing with other alternatives.

### 4. Efficiency: If you have experienced the same treatment before, would you say that the application has increased efficiency by reducing:

- a. pa.efficiency.1: Complexity or number of tasks
- b. pa.efficiency.2: Number of reworks
- c. pa.efficiency.3: Time consumed

### 5. Effectiveness: The application has increased effectiveness, especially by improving at least one of these items:

a. pa.effectiveness.1: Less mistakes

b. pa.effectiveness.2: Readiness or promptness for different situations

c. pa.effectiveness.3: More personalized treatment

## 6. Empowerment

a. pa.empowerment.3: The application empowers me by increasing my knowledge about the situation or general knowledge about the disease.

## 7. Safety

a. pa.safety.1: I felt safe when using the application.

b. pa.safety.2: The application provides correct information without any mislead or confusion.

c. pa.safety.3: I felt that the application helped me to minimize possible harms during the usage.

## 8. Trustability:

a. pa.trustability I felt that I can trust the application for my privacy and my information.
